# Supplementary material for: Gut microbiota in a mouse model of obesity and peripheral neuropathy associated with plasma and nerve lipidomics and nerve transcriptomics
Source: PubMed Central journal article supplement (PMC10015923; doi:10.1186/s40168-022-01436-3), 2023-03-15
Supplement: 40168_2022_1436_MOESM1_ESM.pdf [file 40168_2022_1436_MOESM1_ESM.pdf]

## SUPPLEMENTARY INFORMATION

### **Gut microbiota in a mouse model of obesity and peripheral neuropathy associate with plasma and nerve lipidomics and nerve transcriptomics**

Mohamed Noureldein<sup>1,§</sup>, Kai Guo<sup>1,§</sup>, Claudia Figueroa-Romero<sup>1,§</sup>, Lucy M. Hinder<sup>1,#</sup>, Stacey A. Sakowski<sup>1</sup>, Amy E. Rumora<sup>1</sup>, Hayley Petit<sup>1</sup>, Masha G. Savelieff<sup>1</sup>, Junguk Hur<sup>2</sup>, Eva L. Feldman<sup>1,\*</sup>

<sup>1</sup>Department of Neurology, University of Michigan, Ann Arbor, MI 48109, USA

<sup>2</sup>Department of Biomedical Sciences, School of Medicine and Health Sciences, University of North Dakota, Grand Forks, ND 58202, USA

<sup>Φ</sup>Current: Reata Pharmaceuticals, Plano, Texas 75024, USA.

Present address:

<sup>#</sup>Reata Pharmaceuticals, Irving, Texas 75063, USA.

<sup>†</sup>Department of Neurology, Columbia University, New York, NY, 10032, USA

<sup>§</sup>Authors contributed equally

\*Address correspondence to:

Eva L. Feldman, MD, PhD

Department of Neurology, University of Michigan

109 Zina Pitcher Place, 5017 AAT-BSRB, Ann Arbor, MI 48109-2200

Phone: 734-763-7269 / Fax: 734-763-7275 / Email: [efeldman@umich.edu](mailto:efeldman@umich.edu)

SUPPLEMENTARY FIGURES

**A** Each tissue at all time points combined

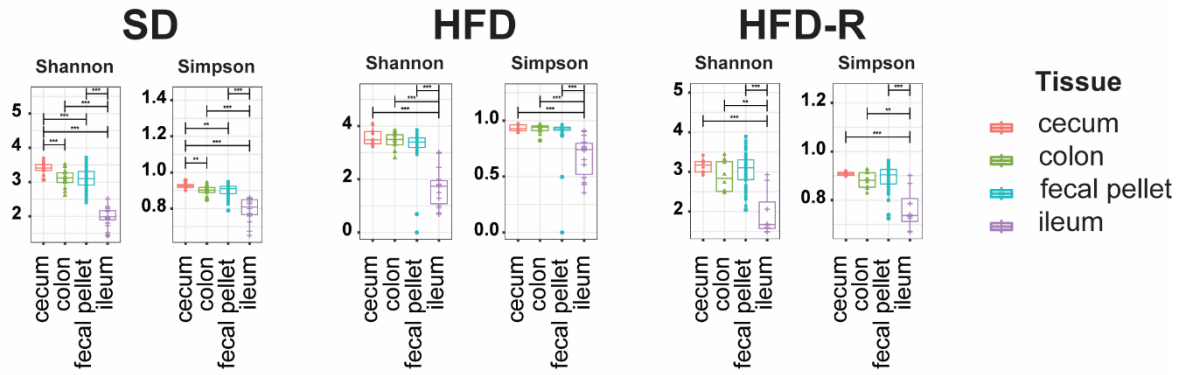

**B** Each time point with all tissues combined

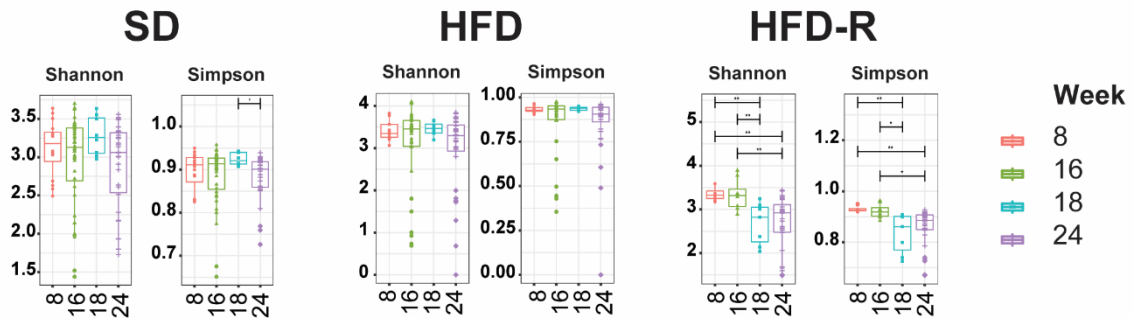

**Figure S1. Alpha diversity across microbiome samples.** Alpha diversity measured by Shannon and Simpson indexes (**A**) by microbial niche, *i.e.*, ileum, cecum, colon, and fecal pellets, independent of time point, or (**B**) by time point at 8, 16, 18, and 24 weeks of age, independent of microbial niche. One-way ANOVA; \* $p < 0.05$ , \*\* $p < 0.01$ , \*\*\* $p < 0.001$ .

**A**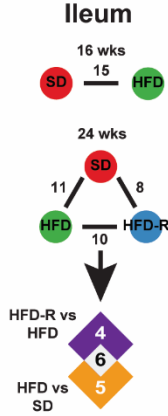**B**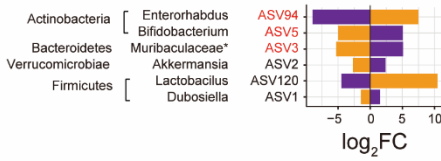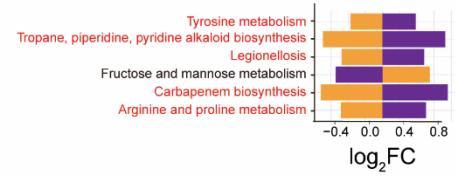**C**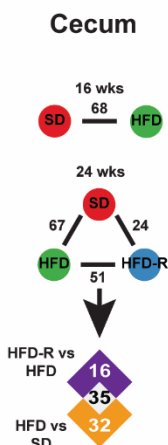**D**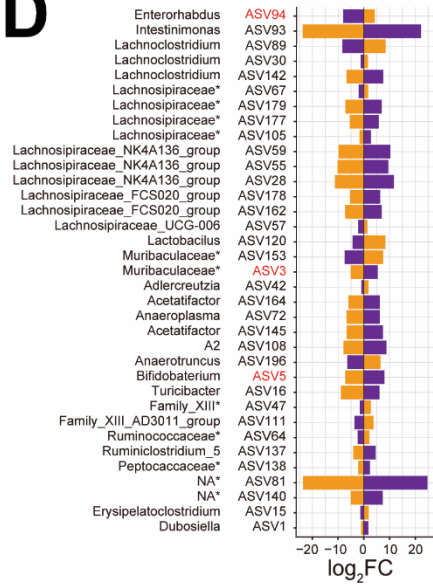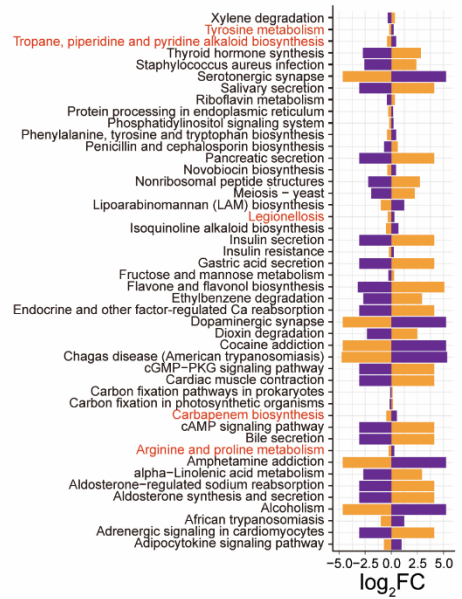**E**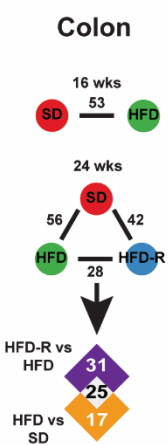**F**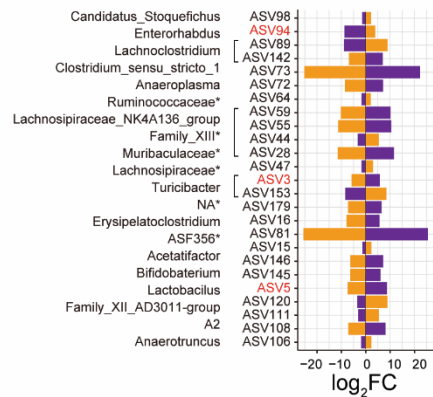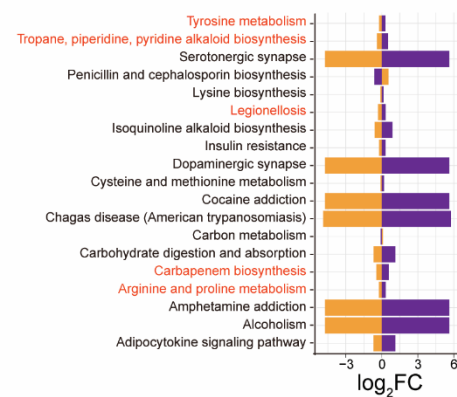

**Figure S2. Dietary reversal shifts microbial taxa signature in obese PN mice.** Analysis to identify differentially abundant bacteria with DESeq2 between HFD versus SD at 16 weeks of age or between HFD versus SD, HFD-R versus HFD, and HFD-R versus SD at 24 weeks of age in **(A)** ileum, **(C)** cecum, and **(E)** colon (adjusted  $P$ -value $<0.05$ ). Overlap in gut microbial taxa (left) and KEGG pathways (level 1, right; HFD versus SD, orange; HFD-R versus HFD, purple) driving differences between dietary fat at 24 weeks in **(B)** ileum, **(D)** cecum, and **(F)** colon presented as bar plots of  $\log_2$  fold-change ( $\log_2FC$ ). ASVs are listed with corresponding genus or family (\*) level. Taxa shared among ileum, cecum, and colon, as well as pathways shared by ileum, cecum, colon, and fecal pellets (**Figure 3**), are listed in red text. Multiple t-testing was used for pathway comparisons and significant pathways were identified by FDR adjusted  $P$ -value  $<0.05$ .



**Figure S3. Full correlation analysis for microbial communities to plasma and sciatic nerve lipidomics.** Full Spearman's correlation analysis heatmaps (FDR<0.05) of relative abundance of PN-associated gut microbiota sensitive to dietary fat at 24 weeks of age with **(A)** plasma DALs and **(B)** sciatic nerve DALs [27], which are increased (Up) or decreased (Down) in the overlapping DALs between HFD vs SD and HFDR vs HFD in ileum, cecum, colon, and fecal pellets. Correlation scale (red, positive; green, negative) is the same for (A) and (B). CE, cholesteryl esters; CL, cardiolipins; DG, diglycerides; FFA, free fatty acids; lysoPC, lysophosphatidylcholines; lysoPE, lysophosphatidylethanolamines; PC, phosphatidylcholines; PE, phosphatidylethanolamines; PI, phosphatidylinositols; pPE, plasmeyl-phosphatidylethanolamines; SM, sphingomyelins; TG, triglycerides.



**Figure S4. Full correlation analysis for microbial communities to plasma and sciatic nerve transcriptomics.** Full Spearman's correlation analysis heatmaps (FDR<0.05) of relative abundance of PN-associated gut microbiota sensitive to dietary fat at 24 weeks of age with **(A)** plasma DEGs (n=11) or **(B)** sciatic nerve DEGs [27] (n=11), which are upregulated (Up) or downregulated (Down) in the overlapping DEGs between HFD vs SD and HFDR vs HFD in ileum, cecum, colon, and fecal pellets. Correlation scale (red, positive; green, negative) is the same for (A) and (B). C, colon; Ce, cecum; I, ileum; P, pellets.



## SUPPLEMENTARY TABLES

**Table S1. Study microbiome samples.** Type (ileum, cecum, colon, fecal pellets), number, and time points for collected microbiome samples.

| Sample              | Age (weeks) | Group | n  |
|---------------------|-------------|-------|----|
| Ileum (38)          | 16          | SD    | 8  |
|                     |             | HFD   | 6  |
|                     | 24          | SD    | 8  |
|                     |             | HFD   | 8  |
|                     |             | HFD-R | 8  |
| Cecum (38)          | 16          | SD    | 8  |
|                     |             | HFD   | 6  |
|                     | 24          | SD    | 8  |
|                     |             | HFD   | 8  |
|                     |             | HFD-R | 8  |
| Colon (36)          | 16          | SD    | 8  |
|                     |             | HFD   | 6  |
|                     | 24          | SD    | 6  |
|                     |             | HFD   | 8  |
|                     |             | HFD-R | 8  |
| Fecal pellets (247) | 8           | SD    | 16 |
|                     |             | HFD   | 16 |
|                     |             | HFD-R | 8  |
|                     | 10          | SD    | 15 |
|                     |             | HFD   | 16 |
|                     |             | HFD-R | 8  |
|                     | 12          | SD    | 16 |
|                     |             | HFD   | 16 |
|                     |             | HFD-R | 6  |
|                     | 16          | SD    | 16 |
|                     |             | HFD   | 14 |
|                     |             | HFD-R | 8  |
|                     | 18          | SD    | 8  |
|                     |             | HFD   | 8  |
|                     |             | HFD-R | 7  |
|                     | 20          | SD    | 8  |
|                     |             | HFD   | 8  |
|                     |             | HFD-R | 8  |
|                     | 22          | SD    | 7  |
|                     |             | HFD   | 7  |
| HFD-R               |             | 7     |    |
| 24                  | SD          | 8     |    |
|                     | HFD         | 8     |    |
|                     | HFD-R       | 8     |    |

**Table S2. Beta diversity in microbiome samples.** Permutational analysis of variance (PERMANOVA) of beta diversity in mouse gut bacteria responding to dietary fat content.

| <b>Age (weeks)</b> | <b>Ileum</b>     | <b>Cecum</b> | <b>Colon</b> | <b>Fecal pellets</b> |
|--------------------|------------------|--------------|--------------|----------------------|
|                    | <i>P</i> -values |              |              |                      |
| <b>8</b>           |                  |              |              | 0.001                |
| <b>16</b>          | 0.002            | 0.001        | 0.003        | 0.001                |
| <b>18</b>          |                  |              |              | 0.001                |
| <b>24</b>          | 0.001            | 0.001        | 0.001        | 0.001                |

## References

27. O'Brien, P.D., et al., Integrated lipidomic and transcriptomic analyses identify altered nerve triglycerides in mouse models of prediabetes and type 2 diabetes. *Dis Model Mech*, 2019.
